# Supplementary material for: Erythropoietin re-wires cognition-associated transcriptional networks
Source: Springer Nature journal article supplement (doi:10.1038/s41467-023-40332-8), 2023-08-21
Supplement: MOESM11 [file 41467_2023_40332_MOESM11_ESM.pdf]

Reporting Summary

Nature Portfolio wishes to improve the reproducibility of the work that we publish. This form provides structure for consistency and transparency in reporting. For further information on Nature Portfolio policies, see our [Editorial Policies](#) and the [Editorial Policy Checklist](#).

Statistics

For all statistical analyses, confirm that the following items are present in the figure legend, table legend, main text, or Methods section.

- |                                     |                                                                                                                                                                                                                                                                                                |
|-------------------------------------|------------------------------------------------------------------------------------------------------------------------------------------------------------------------------------------------------------------------------------------------------------------------------------------------|
| n/a                                 | Confirmed                                                                                                                                                                                                                                                                                      |
| <input type="checkbox"/>            | <input checked="" type="checkbox"/> The exact sample size ( <i>n</i> ) for each experimental group/condition, given as a discrete number and unit of measurement                                                                                                                               |
| <input type="checkbox"/>            | <input checked="" type="checkbox"/> A statement on whether measurements were taken from distinct samples or whether the same sample was measured repeatedly                                                                                                                                    |
| <input type="checkbox"/>            | <input checked="" type="checkbox"/> The statistical test(s) used AND whether they are one- or two-sided<br><i>Only common tests should be described solely by name; describe more complex techniques in the Methods section.</i>                                                               |
| <input type="checkbox"/>            | <input checked="" type="checkbox"/> A description of all covariates tested                                                                                                                                                                                                                     |
| <input type="checkbox"/>            | <input checked="" type="checkbox"/> A description of any assumptions or corrections, such as tests of normality and adjustment for multiple comparisons                                                                                                                                        |
| <input type="checkbox"/>            | <input checked="" type="checkbox"/> A full description of the statistical parameters including central tendency (e.g. means) or other basic estimates (e.g. regression coefficient) AND variation (e.g. standard deviation) or associated estimates of uncertainty (e.g. confidence intervals) |
| <input type="checkbox"/>            | <input checked="" type="checkbox"/> For null hypothesis testing, the test statistic (e.g. <i>F</i> , <i>t</i> , <i>r</i> ) with confidence intervals, effect sizes, degrees of freedom and <i>P</i> value noted<br><i>Give P values as exact values whenever suitable.</i>                     |
| <input checked="" type="checkbox"/> | <input type="checkbox"/> For Bayesian analysis, information on the choice of priors and Markov chain Monte Carlo settings                                                                                                                                                                      |
| <input type="checkbox"/>            | <input checked="" type="checkbox"/> For hierarchical and complex designs, identification of the appropriate level for tests and full reporting of outcomes                                                                                                                                     |
| <input type="checkbox"/>            | <input checked="" type="checkbox"/> Estimates of effect sizes (e.g. Cohen's <i>d</i> , Pearson's <i>r</i> ), indicating how they were calculated                                                                                                                                               |

Our web collection on [statistics for biologists](#) contains articles on many of the points above.

Software and code

Policy information about [availability of computer code](#)

|                 |                                                                                                                                                                                                                                                                                                                                                                                                                                                                                                                                                                                                                                                   |
|-----------------|---------------------------------------------------------------------------------------------------------------------------------------------------------------------------------------------------------------------------------------------------------------------------------------------------------------------------------------------------------------------------------------------------------------------------------------------------------------------------------------------------------------------------------------------------------------------------------------------------------------------------------------------------|
| Data collection | <p>The details of the data generation are provided in the method sections of this manuscript. The data is available at the GSE220522. The computer code is provided as source file, is also on <a href="https://github.com/Manu-1512/Erythropoietin-says-Dracarys">https://github.com/Manu-1512/Erythropoietin-says-Dracarys</a> and on zenodo for citations Singh, Manvendra. (2023). Erythropoietin rewires cognition-associated transcriptional networks. <a href="https://doi.org/10.5281/zenodo.8071471">https://doi.org/10.5281/zenodo.8071471</a></p>                                                                                      |
| Data analysis   | <p>The details of the data generation are provided in the method sections of this manuscript. Additionally, we provide all the computer codes on the GitHub repository. The link can be found on <a href="https://github.com/Manu-1512/Erythropoietin-says-Dracarys">https://github.com/Manu-1512/Erythropoietin-says-Dracarys</a></p> <p>10X Genomics CellRanger count v6.1.1 (To obtain gene/count matrix)<br/>CellBender 0.2.1 (removal of background RNA)<br/>Data analysis softwares are following<br/>edgeR 3.42.4<br/>slingshot 2.8.0<br/>Nebulosa 1.10.0<br/>harmony 0.1.0<br/>R version 4.2.1</p> <p>dplyr_1.0.10<br/>monocle3_1.3.1</p> |

SingleCellExperiment\_1.20.0  
SummarizedExperiment\_1.28.0  
GenomicRanges\_1.50.2  
GenomeInfoDb\_1.34.7  
IRanges\_2.32.0  
Seurat\_4.3.0  
monocle\_2.24.1  
ggplot2\_3.4.0  
Biobase\_2.58.0

igraph\_1.3.5  
magrittr\_2.0.3  
tensor\_1.5  
limma\_3.54.0  
tidyr\_1.2.1  
shiny\_1.7.4

For manuscripts utilizing custom algorithms or software that are central to the research but not yet described in published literature, software must be made available to editors and reviewers. We strongly encourage code deposition in a community repository (e.g. GitHub). See the Nature Portfolio [guidelines for submitting code & software](#) for further information.

## Data

Policy information about [availability of data](#)

All manuscripts must include a [data availability statement](#). This statement should provide the following information, where applicable:

- Accession codes, unique identifiers, or web links for publicly available datasets
- A description of any restrictions on data availability
- For clinical datasets or third party data, please ensure that the statement adheres to our [policy](#)

Raw and processed data is deposited and the data is available at the GSE220522. The codes for the data analysis is available at <https://github.com/Manu-1512/Erythropoietin-says-Dracarys>, and on the zenodo repository

Singh, Manvendra. (2023). Erythropoietin rewires cognition-associated transcriptional networks. <https://doi.org/10.5281/zenodo.8071471>

## Human research participants

Policy information about [studies involving human research participants and Sex and Gender in Research](#).

Reporting on sex and gender

Population characteristics

Recruitment

Ethics oversight

Note that full information on the approval of the study protocol must also be provided in the manuscript.

## Field-specific reporting

Please select the one below that is the best fit for your research. If you are not sure, read the appropriate sections before making your selection.

☒ Life sciences ☐ Behavioural & social sciences ☐ Ecological, evolutionary & environmental sciences

For a reference copy of the document with all sections, see [nature.com/documents/nr-reporting-summary-flat.pdf](https://www.nature.com/documents/nr-reporting-summary-flat.pdf)

## Life sciences study design

All studies must disclose on these points even when the disclosure is negative.

Sample size

This study includes 23 mice (N=11 EPO, N=12 PL) for the preparation of samples.

Here we were interested in resolving differences in means, i.e. a shift in the location parameter of distributions, by about one standard deviation (SD) or larger, i.e. Cohen's  $d \geq 1$ , which corresponds to a "large" effect size according to Cohen's suggested interpretations.

With a recommended beta value (probability of a type II error) of  $\leq 4 * \alpha$  (probability of a type I error) (Cohen, 1969) and an alpha value of 0.05, we arrive at a statistical power (1-beta)  $\geq 0.8$ . Required sample sizes for two-group and four-group comparisons were pre-calculated in R using the functions `power.t.test()` and `pwr.anova.test()`, respectively, from the R package 'pwr' version 1.3. For example, the required

sample sizes (per group) was  $n = 6$  for an effect size of 1, i.e. a shift in means by one SD, and a power of 0.9. For a power of 0.8, the respective value was  $n = 5$ . For a smaller effect size of only 0.5, i.e. a shift in means by only  $0.5 * SD$ , larger sample sizes of 17 (power = 0.8) and 22 (power = 0.9) are required. All  $n$  values represent biological replicates in this context, technical replicates do not apply.

#### References:

J Cohen (1969) Statistical Power Analysis for the Behavioral Sciences.  
Erlbaum, Hillsdale, NJ, USA

R Core Team (2022) R: A language and environment for statistical computing. R Foundation for Statistical Computing, Vienna, Austria.

|                 |                                                                                                                                                               |
|-----------------|---------------------------------------------------------------------------------------------------------------------------------------------------------------|
| Data exclusions | In one of the transcriptomics clustering analysis, we had found that one of the six sample was an outlier, so we removed it to obtain the robust set of DEGs. |
| Replication     | Six total replication per condition. All $n$ values represent biological replicates in this context, technical replicates do not apply.                       |
| Randomization   | Not applicable because we used inbred strains.                                                                                                                |
| Blinding        | Not applicable because we used inbred strains.                                                                                                                |

## Behavioural & social sciences study design

All studies must disclose on these points even when the disclosure is negative.

|                   |                |
|-------------------|----------------|
| Study description | Not applicable |
| Research sample   | Not applicable |
| Sampling strategy | Not applicable |
| Data collection   | Not applicable |
| Timing            | Not applicable |
| Data exclusions   | Not applicable |
| Non-participation | Not applicable |
| Randomization     | Not applicable |

## Ecological, evolutionary & environmental sciences study design

All studies must disclose on these points even when the disclosure is negative.

|                          |                |
|--------------------------|----------------|
| Study description        | Not applicable |
| Research sample          | Not applicable |
| Sampling strategy        | Not applicable |
| Data collection          | Not applicable |
| Timing and spatial scale | Not applicable |
| Data exclusions          | Not applicable |
| Reproducibility          | Not applicable |
| Randomization            | Not applicable |
| Blinding                 | Not applicable |

Did the study involve field work? ☐ Yes ☒ No

## Reporting for specific materials, systems and methods

We require information from authors about some types of materials, experimental systems and methods used in many studies. Here, indicate whether each material, system or method listed is relevant to your study. If you are not sure if a list item applies to your research, read the appropriate section before selecting a response.

### Materials & experimental systems

n/a Involved in the study

☒ ☐ Antibodies

☒ ☐ Eukaryotic cell lines

☒ ☐ Palaeontology and archaeology

☐ ☒ Animals and other organisms

☒ ☐ Clinical data

☒ ☐ Dual use research of concern

### Methods

n/a Involved in the study

☒ ☐ ChIP-seq

☒ ☐ Flow cytometry

☒ ☐ MRI-based neuroimaging

### Antibodies

Antibodies used

Validation

### Eukaryotic cell lines

Policy information about [cell lines and Sex and Gender in Research](#)

Cell line source(s)

Authentication

Mycoplasma contamination

Commonly misidentified lines (See [ICLAC](#) register)

### Palaeontology and Archaeology

Specimen provenance

Specimen deposition

Dating methods

☐ Tick this box to confirm that the raw and calibrated dates are available in the paper or in Supplementary Information.

Ethics oversight

Note that full information on the approval of the study protocol must also be provided in the manuscript.

### Animals and other research organisms

Policy information about [studies involving animals](#); [ARRIVE guidelines](#) recommended for reporting animal research, and [Sex and Gender in Research](#)

Laboratory animals

Note: All males mice were sacrificed at P49 for snRNA-seq and NexCreERT2:TdTomato mice for Electrophysiology, All males were sacrificed between P49-P55

All mice were housed in a temperature controlled environment ( $21 \pm 2^\circ\text{C}$ ) on a 12 h light–dark cycle with food and water available ad libitum.

Wild animals

No wild animals were used

Reporting on sex

Experiments performed on male mice

Field-collected samples

No field collected samples were used in this study

Ethics oversight

All experiments were approved by the local Animal Care and Use Committee (Niedersächsisches Landesamt für Verbraucherschutz und Lebensmittelsicherheit, LAVES) and conducted in accordance with the German Animal Protection Law.

Note that full information on the approval of the study protocol must also be provided in the manuscript.

## Clinical data

Policy information about [clinical studies](#)

All manuscripts should comply with the ICMJE [guidelines for publication of clinical research](#) and a completed [CONSORT checklist](#) must be included with all submissions.

Clinical trial registration

Not applicable

Study protocol

Not applicable

Data collection

Not applicable

Outcomes

Not applicable

## Dual use research of concern

Policy information about [dual use research of concern](#)

### Hazards

Could the accidental, deliberate or reckless misuse of agents or technologies generated in the work, or the application of information presented in the manuscript, pose a threat to:

No | Yes

- ☒ ☐ Public health
- ☒ ☐ National security
- ☒ ☐ Crops and/or livestock
- ☒ ☐ Ecosystems
- ☒ ☐ Any other significant area

### Experiments of concern

Does the work involve any of these experiments of concern:

No | Yes

- ☒ ☐ Demonstrate how to render a vaccine ineffective
- ☒ ☐ Confer resistance to therapeutically useful antibiotics or antiviral agents
- ☒ ☐ Enhance the virulence of a pathogen or render a nonpathogen virulent
- ☒ ☐ Increase transmissibility of a pathogen
- ☒ ☐ Alter the host range of a pathogen
- ☒ ☐ Enable evasion of diagnostic/detection modalities
- ☒ ☐ Enable the weaponization of a biological agent or toxin
- ☒ ☐ Any other potentially harmful combination of experiments and agents

## ChIP-seq

### Data deposition

- ☐ Confirm that both raw and final processed data have been deposited in a public database such as [GEO](#).
- ☐ Confirm that you have deposited or provided access to graph files (e.g. BED files) for the called peaks.

Data access links

*May remain private before publication.*

Not applicable

Files in database submission

Not applicable

Genome browser session  
(e.g. [UCSC](#))

Not applicable

### Methodology

Replicates

Not applicable

Sequencing depth

Not applicable

Antibodies

Not applicable

Peak calling parameters

Not applicable

Data quality

Not applicable

Software

Not applicable

## Flow Cytometry

### Plots

Confirm that:

- ☐ The axis labels state the marker and fluorochrome used (e.g. CD4-FITC).
- ☐ The axis scales are clearly visible. Include numbers along axes only for bottom left plot of group (a 'group' is an analysis of identical markers).
- ☐ All plots are contour plots with outliers or pseudocolor plots.
- ☐ A numerical value for number of cells or percentage (with statistics) is provided.

### Methodology

Sample preparation

Not applicable

Instrument

Not applicable

Software

Not applicable

Cell population abundance

Not applicable

Gating strategy

Not applicable

- ☐ Tick this box to confirm that a figure exemplifying the gating strategy is provided in the Supplementary Information.

## Magnetic resonance imaging

### Experimental design

Design type

Not applicable

Design specifications

Not applicable

Behavioral performance measures

Not applicable

## Acquisition

|                               |                               |                                              |
|-------------------------------|-------------------------------|----------------------------------------------|
| Imaging type(s)               | Not applicable                |                                              |
| Field strength                | Not applicable                |                                              |
| Sequence & imaging parameters | Not applicable                |                                              |
| Area of acquisition           | Not applicable                |                                              |
| Diffusion MRI                 | <input type="checkbox"/> Used | <input checked="" type="checkbox"/> Not used |

## Preprocessing

|                            |                |
|----------------------------|----------------|
| Preprocessing software     | Not applicable |
| Normalization              | Not applicable |
| Normalization template     | Not applicable |
| Noise and artifact removal | Not applicable |
| Volume censoring           | Not applicable |

## Statistical modeling & inference

|                                                                           |                                                                                                       |
|---------------------------------------------------------------------------|-------------------------------------------------------------------------------------------------------|
| Model type and settings                                                   | Not applicable                                                                                        |
| Effect(s) tested                                                          | Not applicable                                                                                        |
| Specify type of analysis:                                                 | <input type="checkbox"/> Whole brain <input type="checkbox"/> ROI-based <input type="checkbox"/> Both |
| Statistic type for inference<br>(See <a href="#">Eklund et al. 2016</a> ) | Not applicable                                                                                        |
| Correction                                                                | Not applicable                                                                                        |

## Models & analysis

|                                               |                                                                                                                                                                                                                                                                                                                                                                                                                                                                                                                                                      |
|-----------------------------------------------|------------------------------------------------------------------------------------------------------------------------------------------------------------------------------------------------------------------------------------------------------------------------------------------------------------------------------------------------------------------------------------------------------------------------------------------------------------------------------------------------------------------------------------------------------|
| n/a                                           | Involvement in the study                                                                                                                                                                                                                                                                                                                                                                                                                                                                                                                             |
| <input type="checkbox"/>                      | <input checked="" type="checkbox"/> Functional and/or effective connectivity                                                                                                                                                                                                                                                                                                                                                                                                                                                                         |
| <input type="checkbox"/>                      | <input checked="" type="checkbox"/> Graph analysis                                                                                                                                                                                                                                                                                                                                                                                                                                                                                                   |
| <input type="checkbox"/>                      | <input checked="" type="checkbox"/> Multivariate modeling or predictive analysis                                                                                                                                                                                                                                                                                                                                                                                                                                                                     |
| Functional and/or effective connectivity      | Spearman's correlation, ranked on the transcriptome-wide expression values                                                                                                                                                                                                                                                                                                                                                                                                                                                                           |
| Graph analysis                                | <p>All of the analysis is performed using the various pre-built packages in R. For details, see Method section of this paper.</p> <p>Briefly, the first 30 PC dimensions were used in constructing the shared-nearest neighbor (SNN) graph and generating 2-dimension embeddings for data visualization using UMAP.</p> <p>Pyramidal Neurons were then sorted for trajectory and pseudotime analysis using Monocle2 and Slingshot.</p> <p>Regulons were found using the SCENIC package. Each contained at least 15 genes based on AUCell scores.</p> |
| Multivariate modeling and predictive analysis | There are various multivariate analysis is presented here. All of the analysis is detailed in our method section and on GitHub link. For details, see Method section of this paper                                                                                                                                                                                                                                                                                                                                                                   |
